# Supplementary material for: Solution and solid-state fluorescence emission from cyanostyrene molecules with multiple nitrogen atoms
Source: Royal Society of Chemistry journal article supplement (doi:10.1039/d4cp03297g), 2024-01-01
Supplement: d4cp03297g1.pdf [file d4cp03297g1.pdf]

## Supporting Information

### Dual-state Fluorescence Emission from Cyanostyrene molecules with multiple nitrogen atoms

Yang Chen,<sup>a</sup> Smruti Ranjan Sahoo,<sup>b,c</sup> Glib V. Baryshnikov,<sup>\*b</sup> Lei Gao,<sup>\*a,d</sup> Zhijia Zhu<sup>\*a</sup>  
and Hongwei Wu<sup>\*a</sup>

#### 1 Experimental Section

##### 1.1 General methods

**Materials:** 1H-benzimidazole-2-acetonitrile, 4-pyridine carboxaldehyde, 2-chloro-4-pyridinecarboxaldehyde, 6-quinoline carboxaldehyde, benzaldehyde, lauric acid, and rhodamine B were obtained from Shanghai Hao Hong Biopharmaceutical Technology Co. sodium hydroxide, ethanol, ethyl acetate, dichloromethane, petroleum ether, acetone, tetrahydrofuran, and dimethyl sulfoxide were sourced from Shanghai Titan Technology Co. Column chromatography silica gel was procured from Yantai Jiang you Silicone Development Co. All chemicals and reagents were used without further purification.

##### Characterizations and instruments:

<sup>1</sup>H NMR and <sup>13</sup>C NMR were conducted using a Bruker 400L spectrometer. High-resolution mass spectrometry data were recorded on a matrix-assisted laser desorption ionization time-of flight (MALDI-TOF) mass spectrometer (5800). Absorption spectra were measured with a Shimadzu 1800 spectrophotometer. Fluorescence spectra were recorded using the Horiba FluoroMax-4 from Horiba Scientific. The fluorescent lifetimes were measured with the Edinburgh FLS1000 and Horiba FluoroMax+ spectrofluorometers. The fluorescence quantum yields of solid powders and PMMA doped films were measured using a QM40 with an integrating sphere ( $\phi$  150 mm) from Photo Technology International, Inc. (PTI, USA) and a Hamamatsu Photonics C11347-11 with a Quantaaurus-QY measurement system, respectively.

##### 1.2 Computational details

The spin-orbit coupling matrix elements (SOCMEs)<sup>1-3</sup> between the energetically lowest triplet states ( $T_j$ ) and singlet state ( $S_1$ ) was calculated as root mean squares that

means square root of the sum of squares of spin-orbit coupling matrix elements of all sublevels of the unoccupied states.<sup>6-8</sup> This is given by:

$$\langle S_i | \hat{H}_{SO} | T_j \rangle = \sqrt{\sum_{m=0,\pm 1} \langle S_i | \hat{H}_{SO} | T_j^m \rangle^2} \quad (1)$$

The spin-orbit coupling operator  $\hat{H}_{SO}$  was considered in our calculations within the zeroth-order regular approximation (ZORA)<sup>9-12</sup> in accordance with the following expression:

$$\hat{H}_{SO} = \frac{c^2}{(2c^2 - V)^2} \sigma(\nabla V \cdot p), \quad (2)$$

where  $\sigma$  – Pauli spin matrix vector,  $p$  – the linear momentum operator;  $c$  – speed of light,  $V$  – Kohn–Sham potential.

The intersystem crossing rate constants ( $k_{ISC}$ ) between the  $S_1$  and  $T_j$  states  $E(S_1) > E(T_j)$  were estimated using the Plotnikov’s simple empirical approximation<sup>13-15</sup>

$$k_{ISC} = k_{S_1 \rightarrow T_j} = 10^{10} \langle S_1 | \hat{H}_{so} | T_j \rangle^2 F_{0m}, \quad (3)$$

where Franck–Condon factors ( $F_{0m}$ ) were approximated using the formula:

$$F_{0m} = \sum_n \prod_v \frac{e^{-y} y^{n_v}}{n_v!} \quad (4)$$

In Equation (4) Huang–Rhys factor  $y$  was assumed to be equal to 0.3 and only one average promotive mode  $\omega_v = 1400 \text{ cm}^{-1}$  was used when considering  $n_v = \Delta E(S_1 - T_j) / \omega_v$ . Such a single-mode approximation was considered efficient and accurate enough for the organic dyes and fluorophores.<sup>16-20</sup>

We performed spin-orbit perturbation calculation using the singlet excited state ( $S_1$ ) optimized geometry to estimate the singlet-triplet  $S_1 - T_1$  SOCMs, and hence  $k_{ISC}$  (from Equation 3 and 4), within the TD-DFT/B3LYP/TZP theory level using the quantum chemistry package, ADF 2023.<sup>21</sup> The dichloromethane solvent within the Conductor like Screening Model (COSMO) of solvation was used for solvation matrix effects consideration. The scalar relativistic (SR) orbitals approach was applied to the spin-orbit perturbation.

In the following section, we have discussed the possible two isomer structures of some reported cyanostyrene. To compute the probability of occurrence of one isomer in between the two isomers (Boltzmann population at thermal equilibrium) as a function of temperature ( $T = 298$  K), we calculated the probability of occurrence for the given isomers using the following equation<sup>22, 23</sup>:

$$P(T) = \frac{e^{-\beta\Delta G^K}}{\sum e^{-\beta\Delta G^K}}, \quad (5)$$

where  $\beta = 1/k_B T$ ,  $k_B$  is the Boltzmann constant and  $\Delta G^K$  is the Gibbs free energy of the  $k$ th isomer.

Neglecting the contributions from the higher excited states, the fluorescence quantum yield ( $\Phi$ ) from the excited state  $S_1$  to the ground state  $S_0$  can be calculated by using the equation<sup>24, 25</sup>:

$$\Phi = \frac{k_r}{k_r + k_{IC} + \sum k_{ISC_i}}, \quad (6)$$

where,  $k_r$  and  $k_{IC}$  are defined before, and  $k_{ISC_i}$  here are the  $S_1 \rightarrow T_i$  singlet and energetically lowest triplet states intersystem crossing rate constants. Referring to the Equation (5) and considering the Boltzmann populations ( $P$ ) for a cyanostyrene compound which possess two possible isomers, the total fluorescence quantum yield ( $\Phi_{tot}$ ) for that compound can be estimated as sum of the fluorescence quantum yield of each  $k$ th isomers with their probability of occurrence. This is given as:

$$\Phi_{tot} = \sum \Phi^K P^K \quad (7)$$

All quantum mechanical simulations are performed at a temperature of 298 K.

## 2 Additional figures and tables

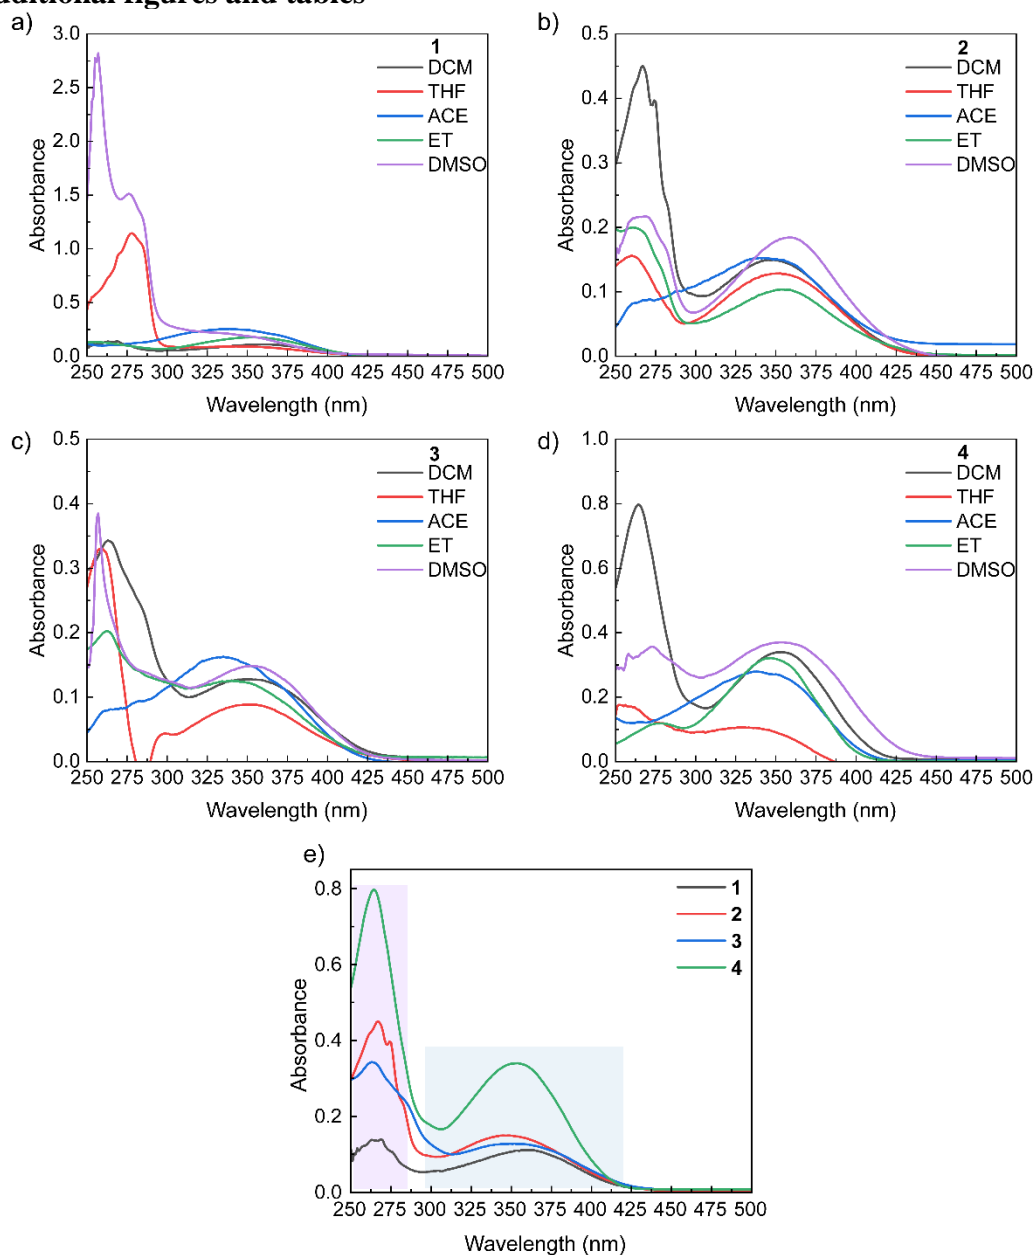

**Fig. S1.** a-d) The UV-vis absorption spectra of compounds **1-4** in five solvents (DCM, THF, ACE, ET and DMSO) at room temperature. e) The UV-vis absorption spectra of compounds **1-4** in DCM at room temperature. The concentration is 100  $\mu\text{M}$ .

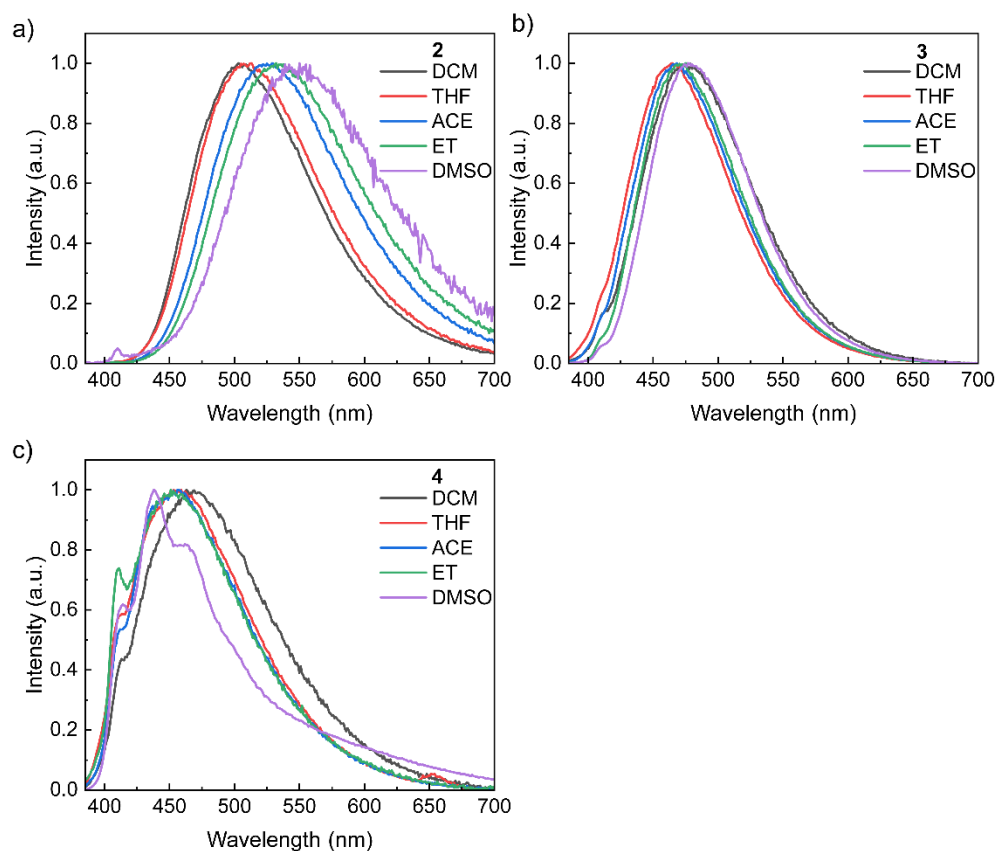

**Fig. S2.** Normalized emission spectra of compounds **2-4** in five solvents (DCM, THF, ACE, ET and DMSO) at room temperature. The concentration is 100  $\mu$ M.

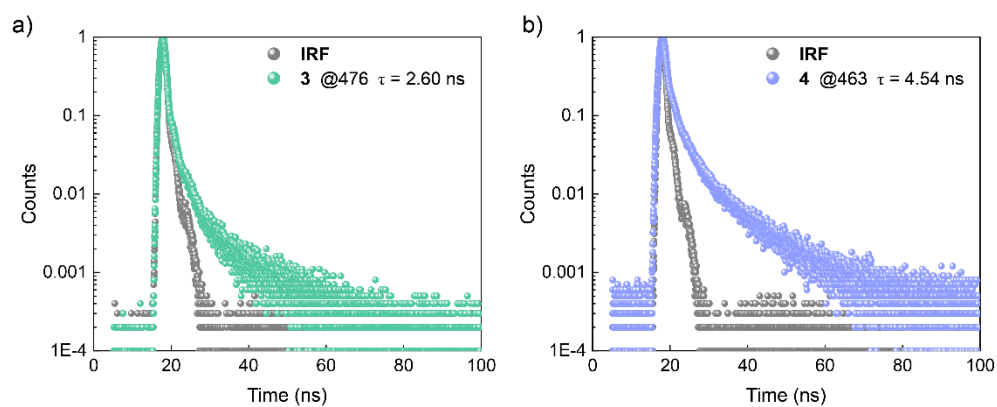

**Fig. S3.** Lifetime decay profiles of compounds **3** and **4** in DCM (100  $\mu$ M) under 365 nm excitation.

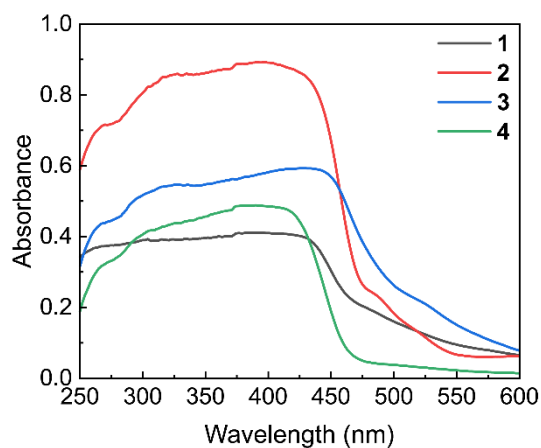

**Fig. S4.** The UV-vis absorption spectra of compounds **1-4** in powder state.

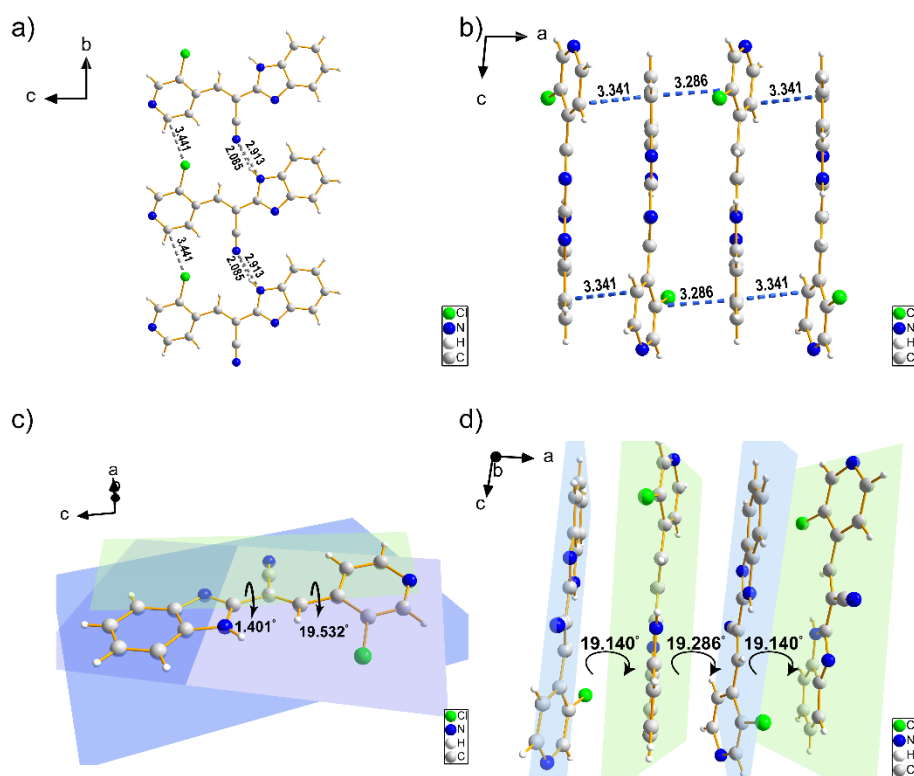

**Fig. S5.** a) Non covalent bonds in the b-c plane of compound **2** (N-H $\cdots$ N: 2.085 Å; C $\equiv$ N $\cdots$ N: 2.913 Å and C-Cl $\cdots$ C: 3.441 Å). b) C $\cdots$ C bonds in the a-c plane of compound **2** (3.286 Å and 3.341 Å). c) The dihedral angle between benzimidazole ring and C=C-C $\equiv$ N (1.401°) and the dihedral angle between 2-chloro-4-pyridine ring and C=C-C $\equiv$ N (19.532°). d) The dihedral angle between benzimidazole ring and 2-chloro-4-pyridine ring (19.140° and 19.286°)

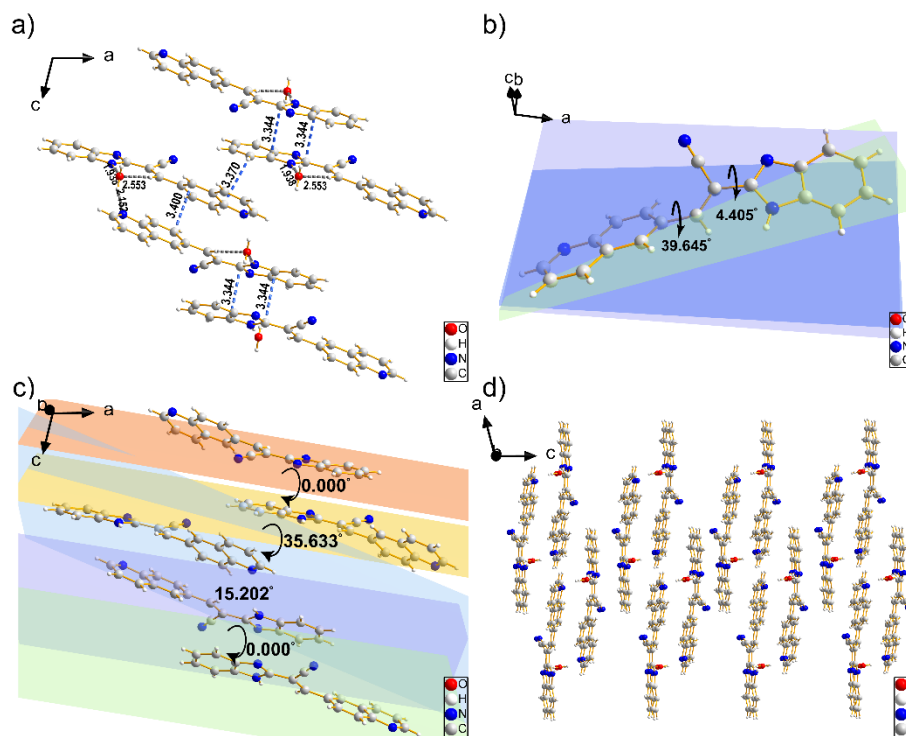

**Fig. S6.** a) Non covalent bonds in the b-c plane of compound **3** (C $\cdots$ C: 3.344 Å, 3.370 Å and 3.400 Å; N-H $\cdots$ O: 1.938 Å; O-H $\cdots$ N: 2.152 Å and C-H $\cdots$ O: 2.553 Å). b) The dihedral angle between benzimidazole ring and C=C-C $\equiv$ N (4.405°) and the dihedral angle between 6-quinoline ring and C=C-C $\equiv$ N (39.645°). c) The dihedral angle between benzimidazole ring 6-quinoline ring (35.633° and 15.202°). d) 2D regular supramolecular tiling pattern in the *a-c* plane of compound **3**.

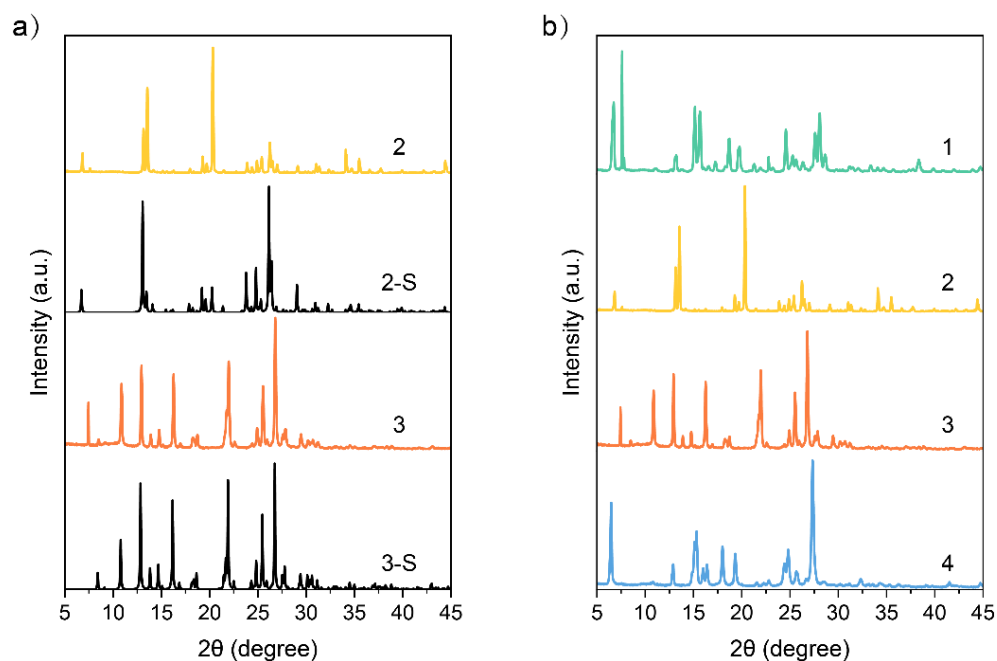

**Fig. S7.** a) The PXRD spectra of compounds **2** and **3**, alongside their simulated PXRD patterns. b) The PXRD patterns of compounds **1-4**.

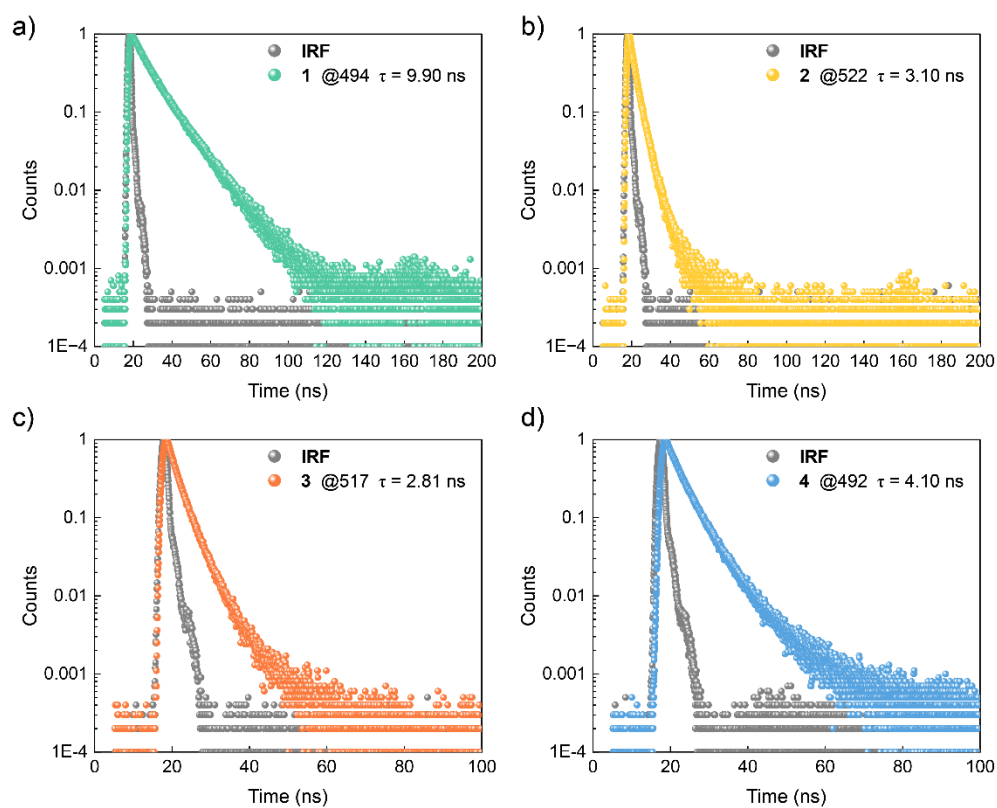

**Fig. S8.** Lifetime decay profiles of compounds **1-4** in powder state under 365 nm excitation.



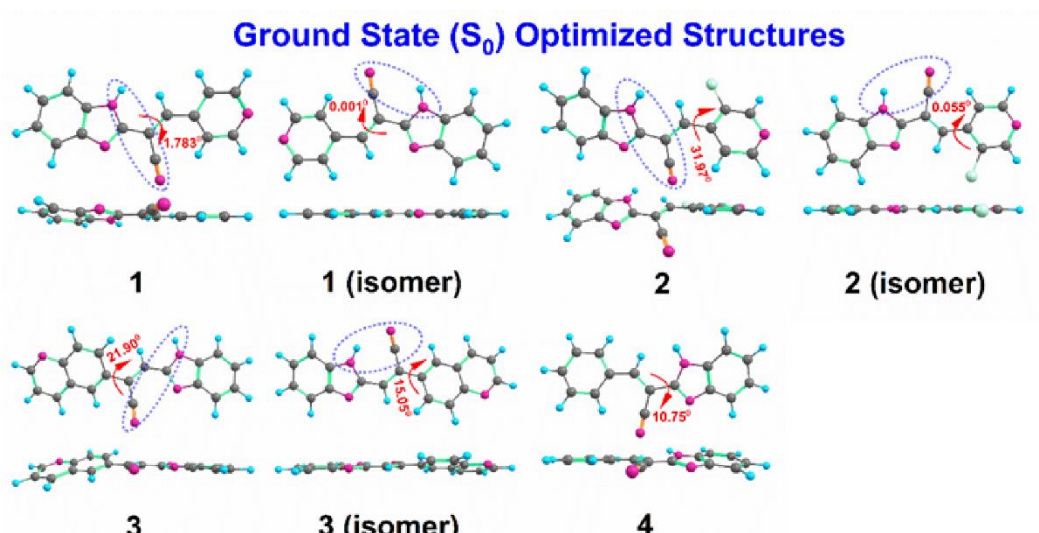

**Fig. S9.**  $S_0$  optimized DCM solvated geometries of compounds **1-4** with the calculated dihedral angles around C=C/C-C bond at the B3LYP/6-311G (d, p) theory level.

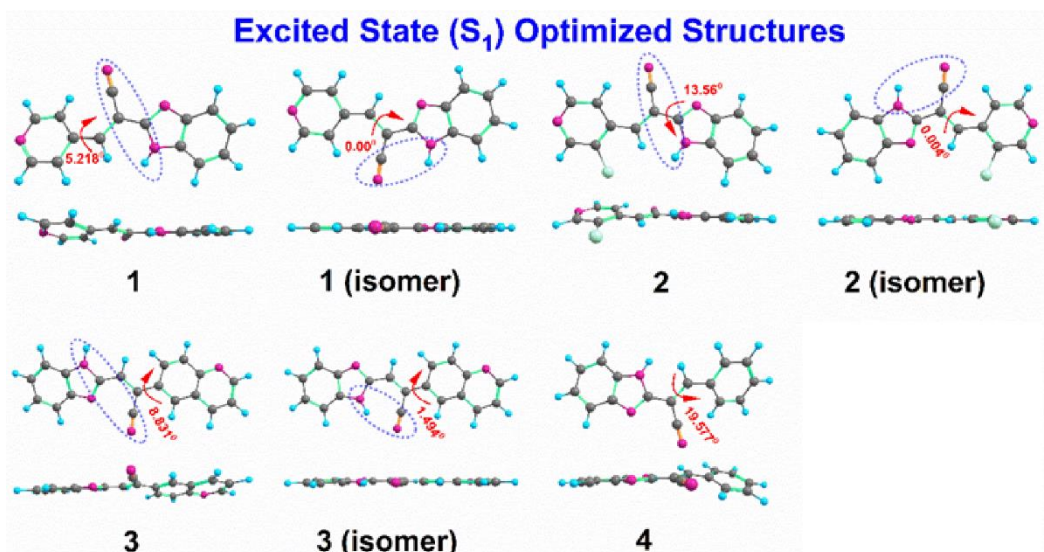

**Fig. S10.**  $S_1$  optimized DCM solvated geometries of compounds **1-4** with the calculated dihedral angles around C=C/C-C bond at the B3LYP/6-311G (d, p) theory level.

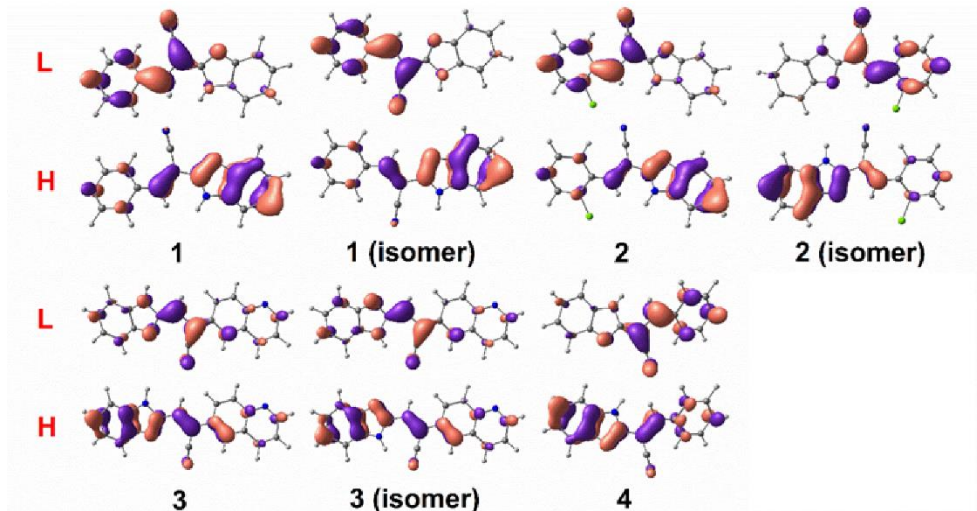

**Fig. S11.** TD-DFT/B3LYP/6-311G (d, p) theory calculated HOMOs (H) and LUMOs (L) for  $S_1$  excited states ICT distribution for **3** and **4**.

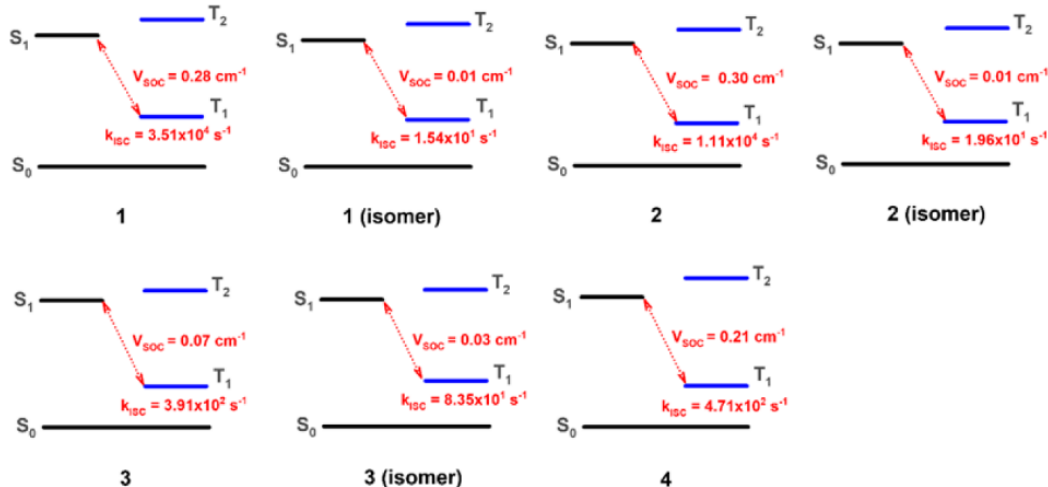

**Fig. S12.** Schematic representation of calculated singlet-triplet ( $S_1 \rightarrow T_1$ ) intersystem crossing ( $k_{ISC}$ ) rates and spin-orbit coupling ( $V_{SOC}$ ) at room temperature for studied cyanostyrene compounds at TD-DFT/B3LYP/TZP level of theory using ADF 2023 package.

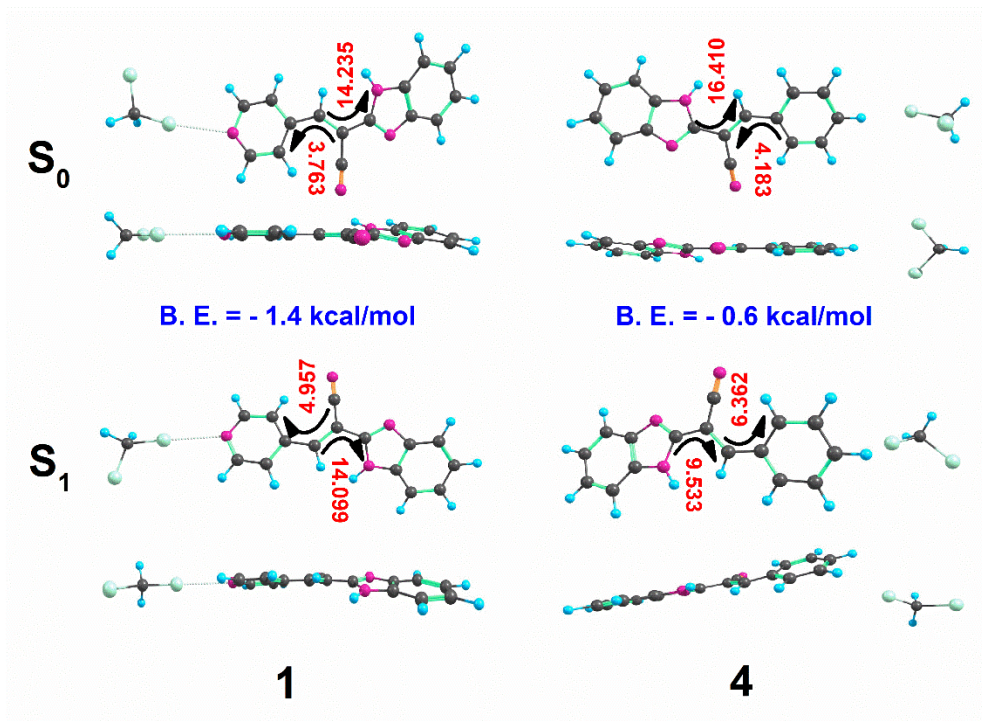

**Fig. S13.** Calculated  $S_0$  and  $S_1$  state structural confirmation of comp **1** and **4** with DCM molecule. The binding energy for complex structure was calculated and shown for  $S_0$  state.

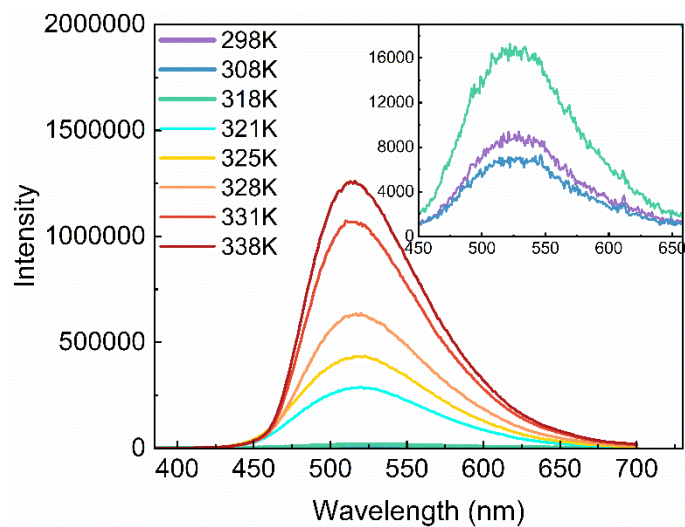

**Fig. S14.** Emission spectra of compound **1** doped with lauric acid at different temperatures.

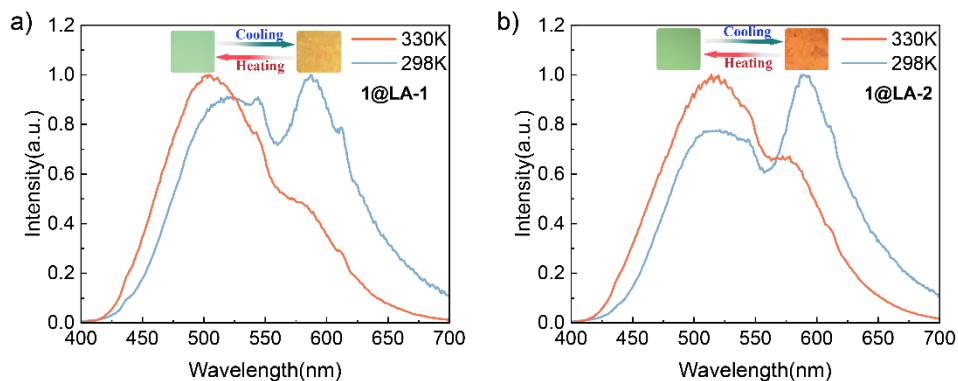

**Fig. S15.** a) Emission spectra of compound **1@LA-1** at different temperatures. b) Emission spectra of compound **1@LA-2** at different temperatures.

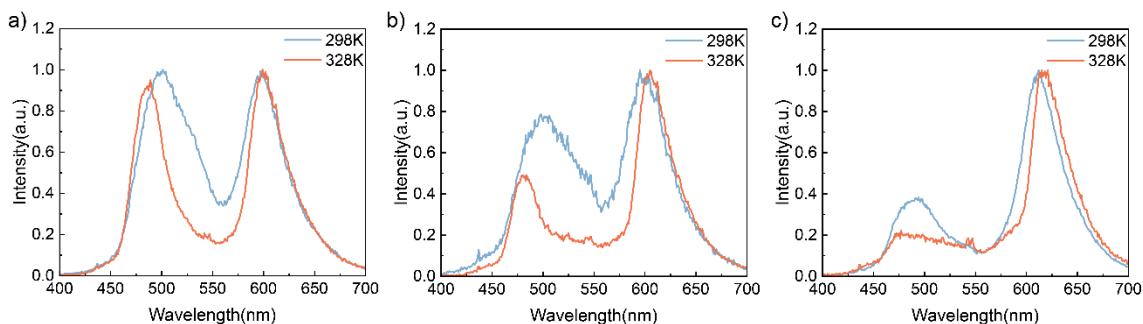

**Fig. S16.** a) Emission spectra of compound **2@LA-1** (**2: RB/100:1**) at different temperatures. b) Emission spectra of compound **2@LA-2** (**2: RB/50:1**) at different temperatures. c) Emission spectra of compound **2@LA-3** (**2: RB/10:1**) at different temperatures.

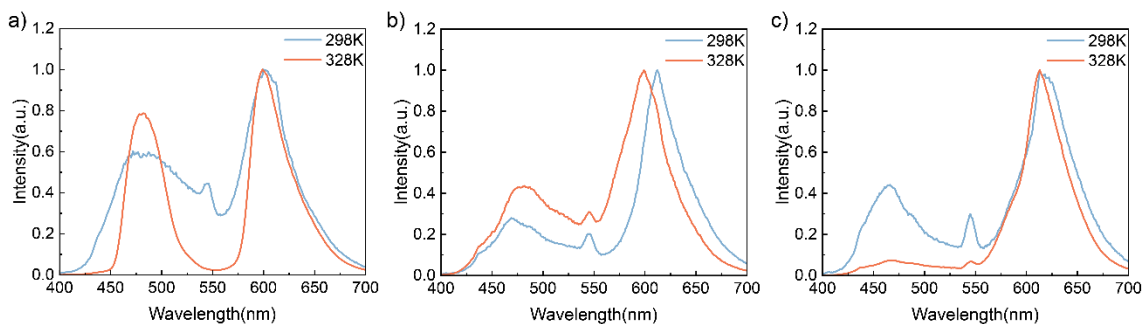

**Fig. S17.** a) Emission spectra of compound **3@LA-1** (**3: RB/100:1**) at different temperatures. b) Emission spectra of compound **3@LA-2** (**3: RB/50:1**) at different temperatures. c) Emission spectra of compound **3@LA-3** (**3: RB/10:1**) at different temperatures.

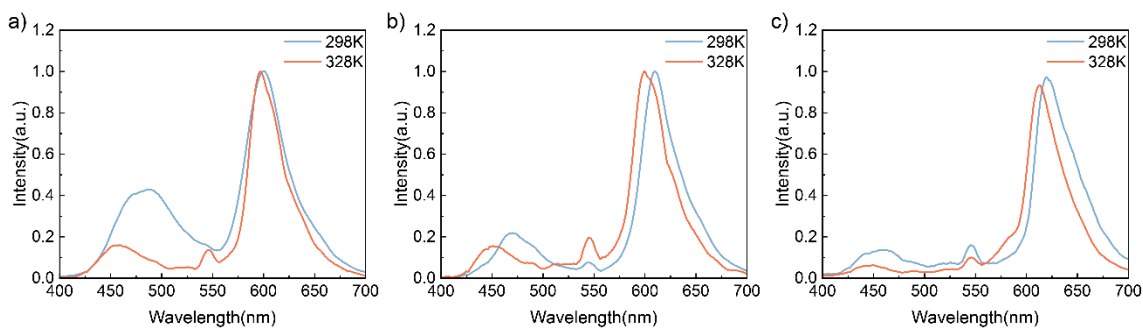

**Fig. S18.** a) Emission spectra of compound **4@LA-1** (**4: RB/100:1**) at different temperatures. b) Emission spectra of compound **4@LA-2** (**4: RB/50:1**) at different temperatures. c) Emission spectra of compound **4@LA-3** (**4: RB/10:1**) at different temperatures.

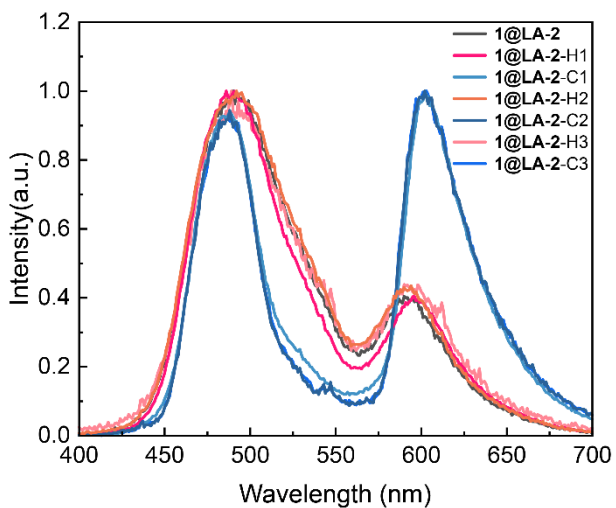

**Fig. S19.** Normalized emission spectra of **1@LA-2** during 3 cycles.

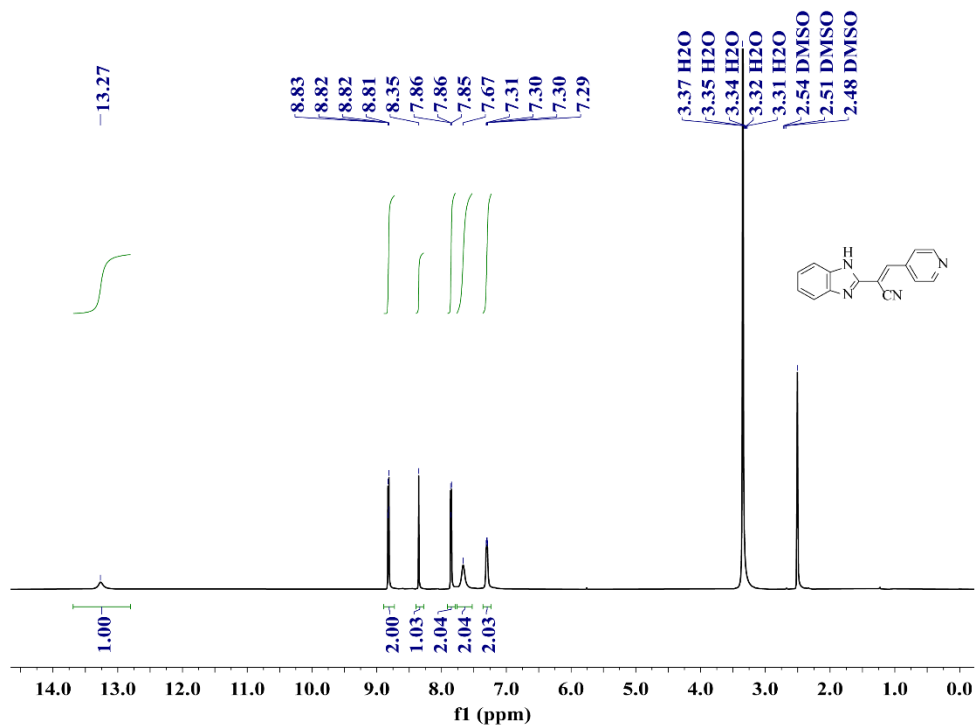

Fig. S20.  $^1\text{H}$  NMR spectrum of compound 1 in  $\text{DMSO-d}_6$ .

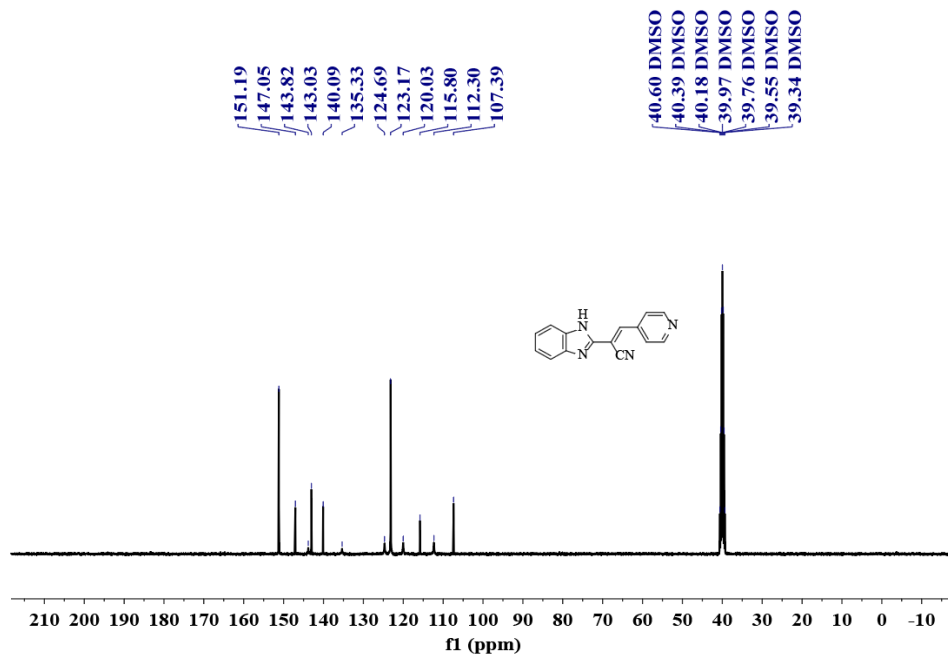

Fig. S21.  $^{13}\text{C}$  NMR spectrum of compound 1 in  $\text{DMSO-d}_6$ .



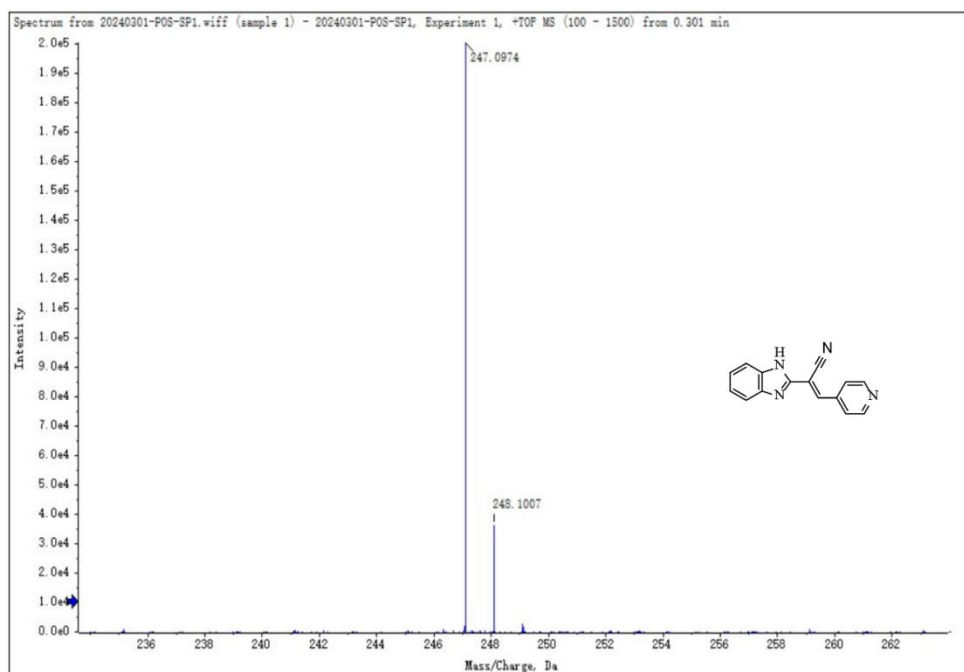

Fig. S22. HRMS Spectrum of compound 1.

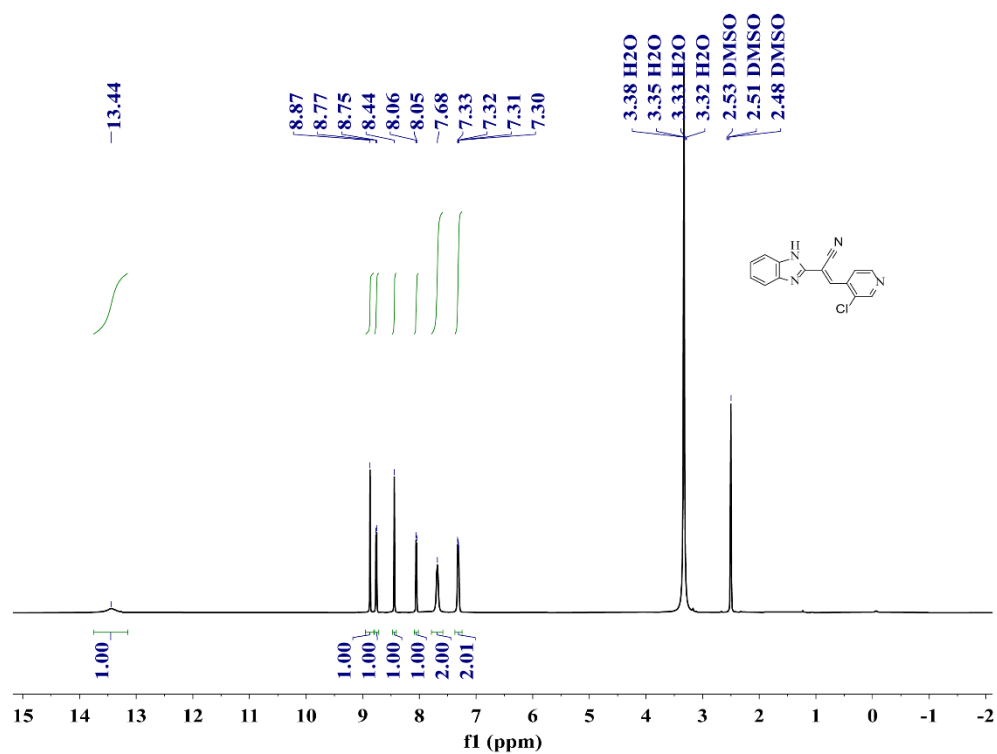

Fig. S23. <sup>1</sup>H NMR spectrum of compound 2 in DMSO-d<sub>6</sub>.

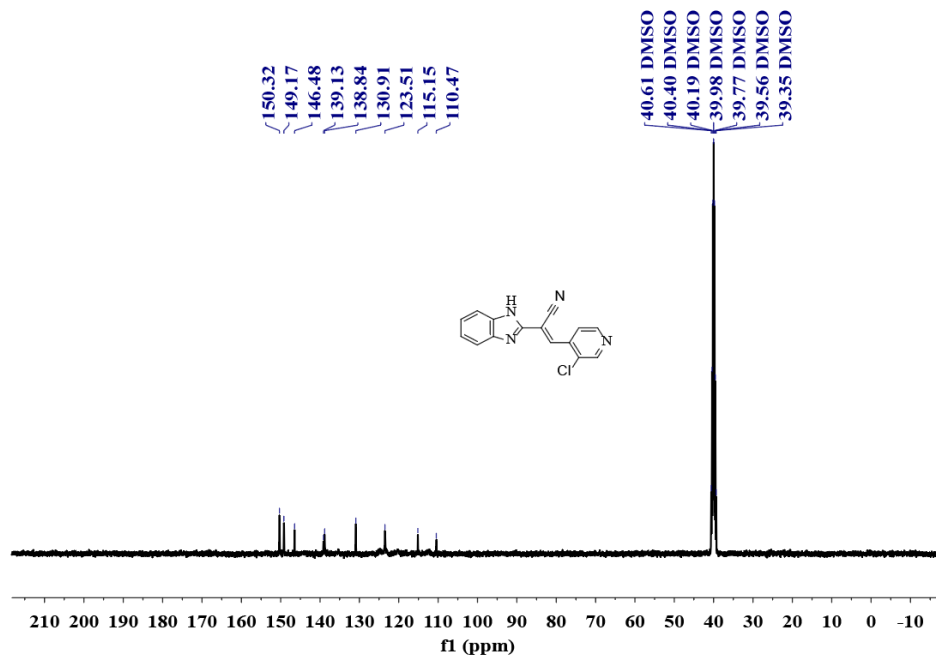

Fig. S24. <sup>13</sup>C NMR spectrum of compound 2 in DMSO-d<sub>6</sub>.

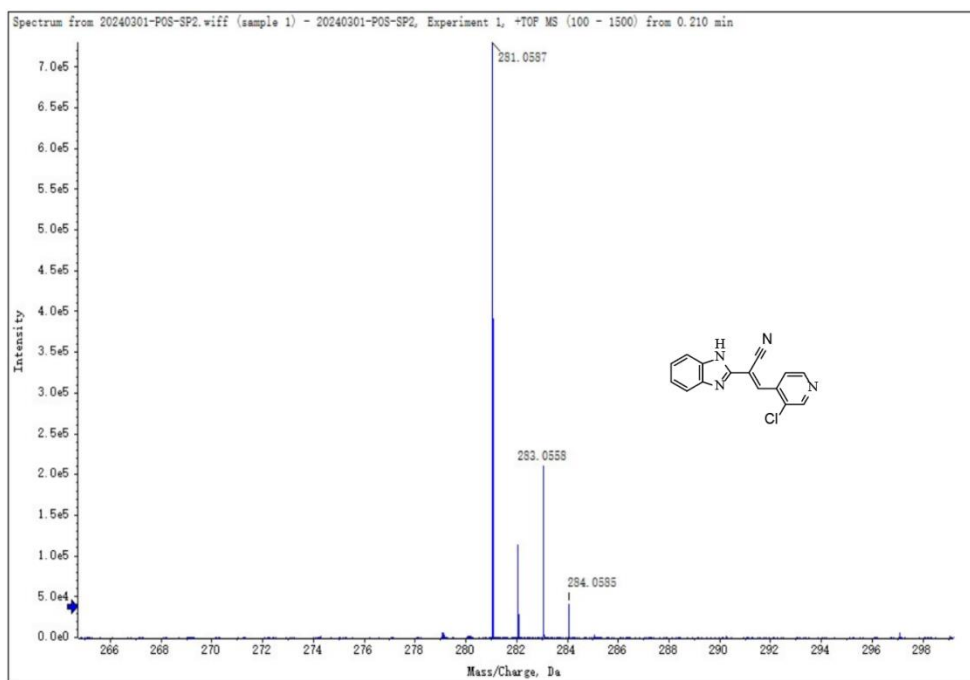

Fig. S25. HRMS Spectrum of compound 2.



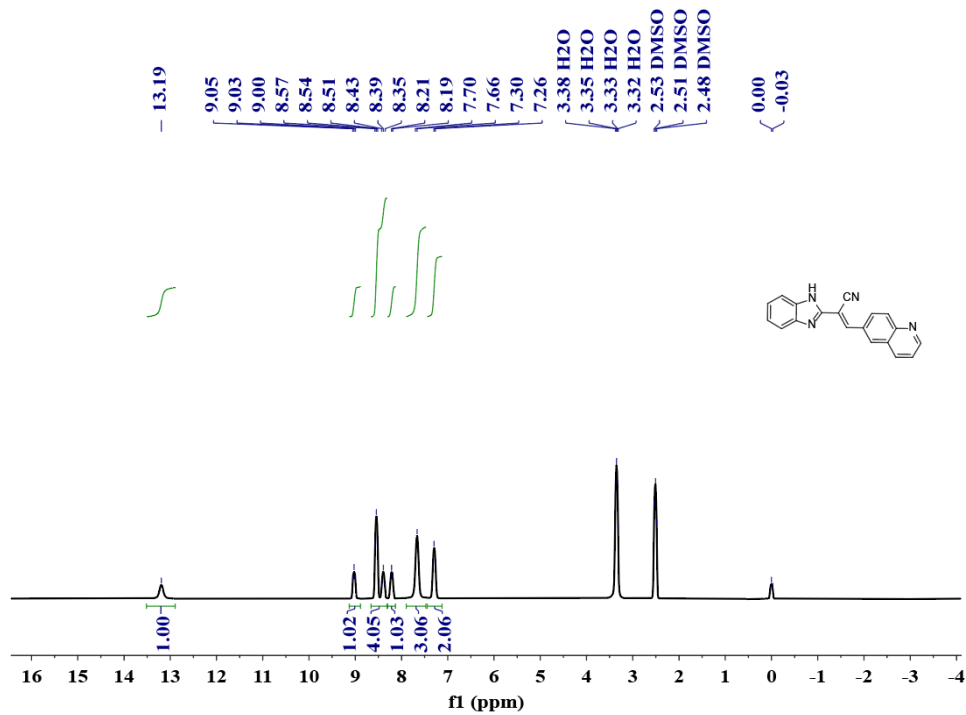

Fig. S26.  $^1\text{H}$  NMR spectrum of compound **3** in  $\text{DMSO-d}_6$ .

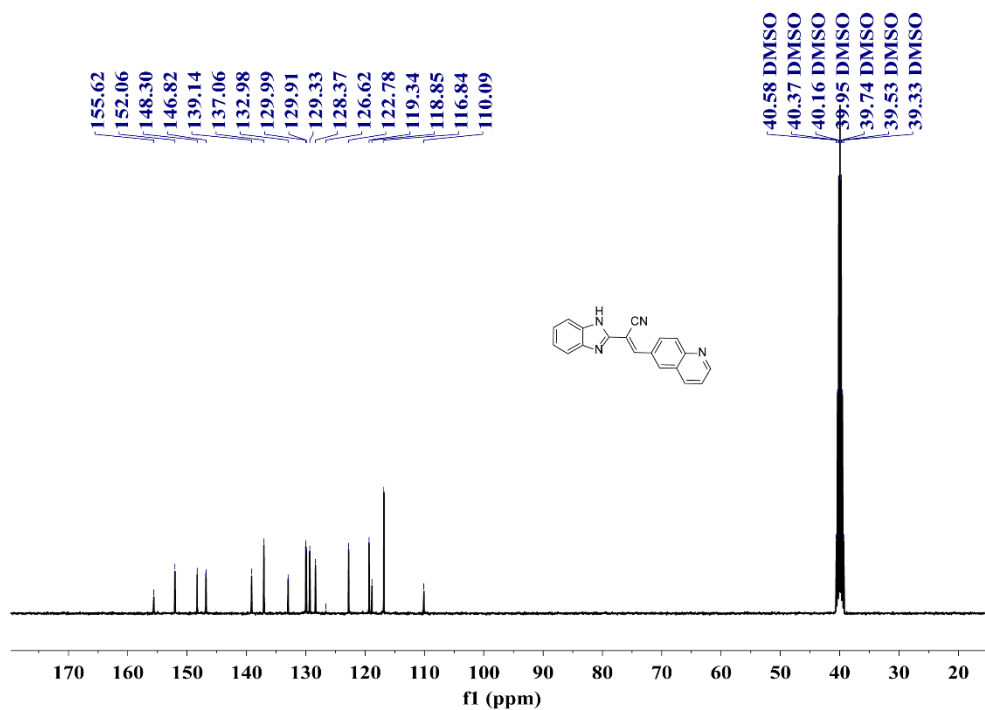

Fig. S27.  $^{13}\text{C}$  NMR spectrum of compound **3** in  $\text{DMSO-d}_6$ .

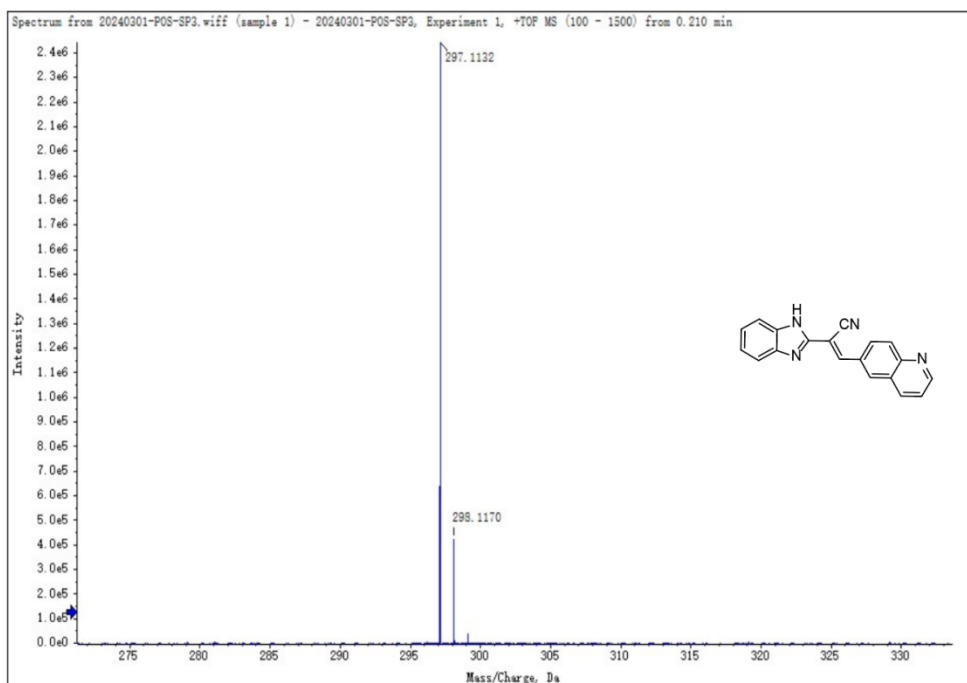

Fig. S28. HRMS Spectrum of compound 3.

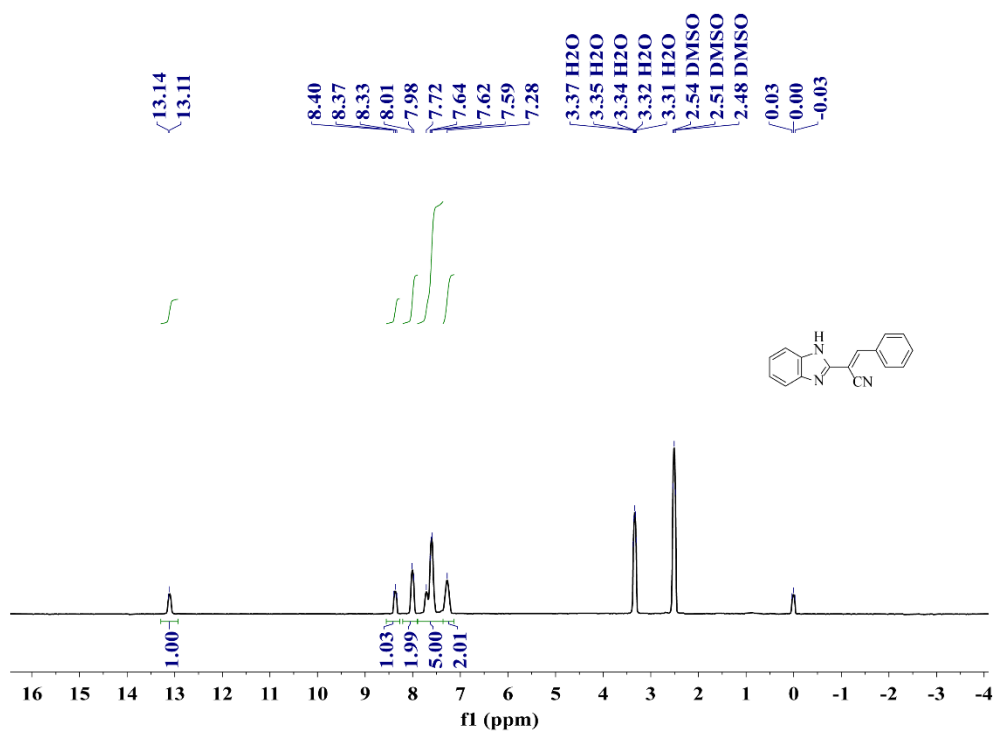

Fig. S29.  $^1\text{H}$  NMR spectrum of compound 4 in  $\text{DMSO-d}_6$ .

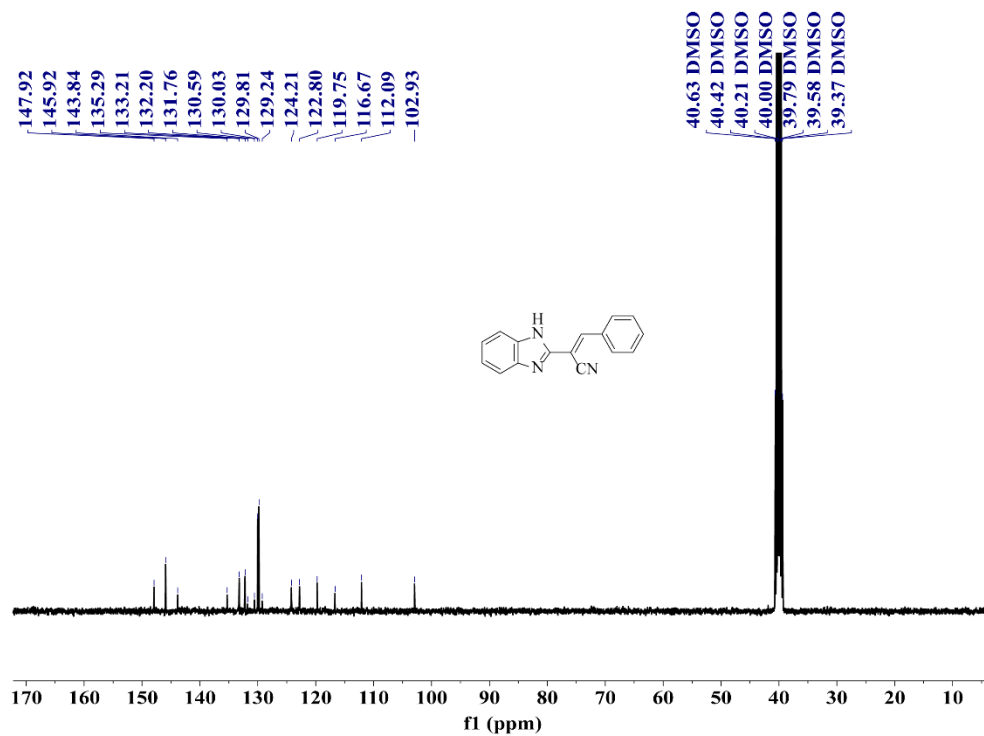

Fig. S30.  $^{13}\text{C}$  NMR spectrum of compound 4 in DMSO- $d_6$ .

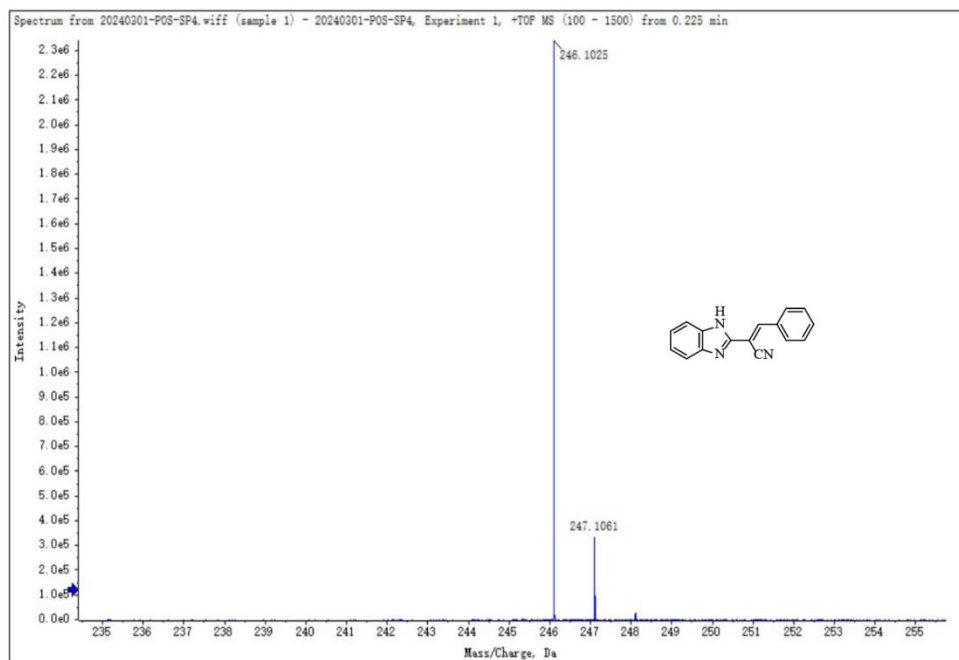

Fig. S31. HRMS Spectrum of compound 4.

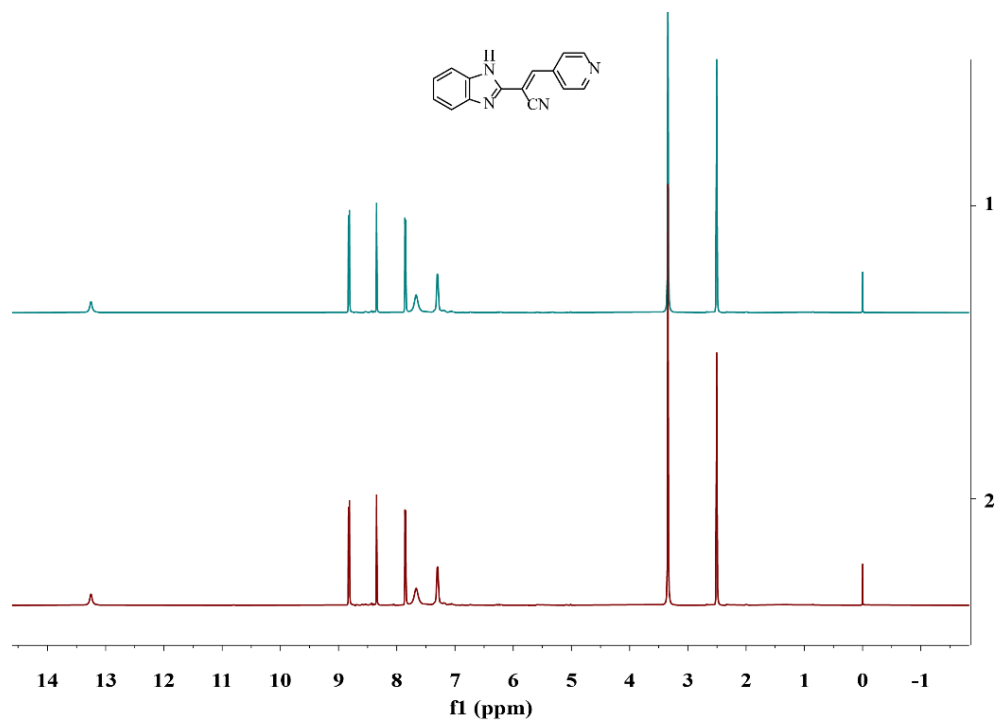

**Fig. S32.** <sup>1</sup>H NMR spectrum of compound 1 before (upper) and after (lower) exposure to 365 nm UV light in DMSO-d<sub>6</sub>.

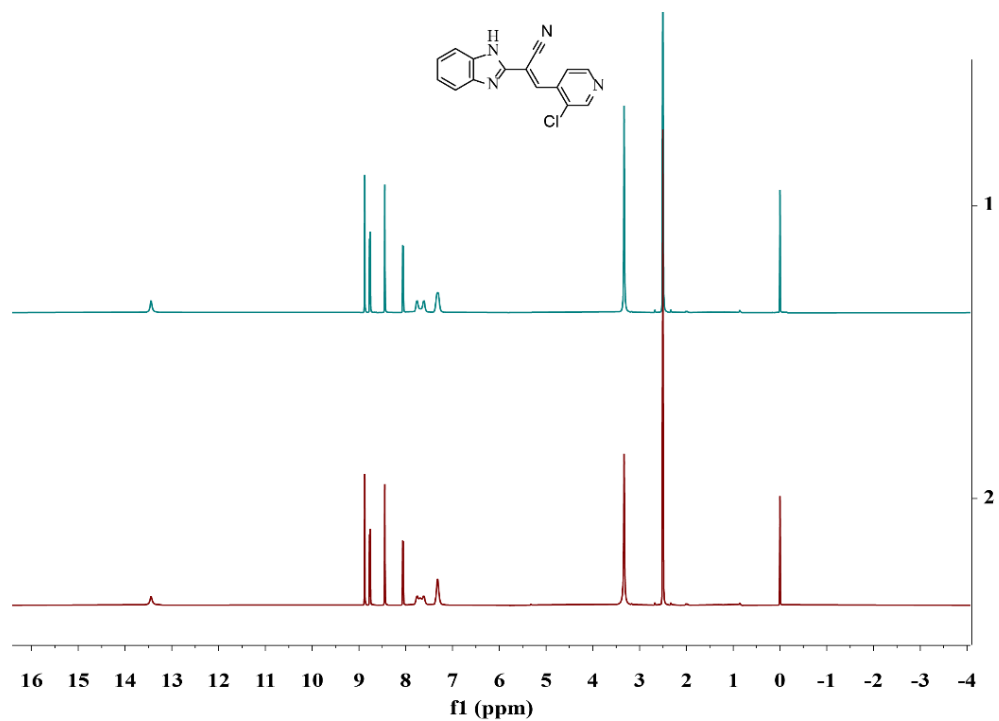

**Fig. S33.** <sup>1</sup>H NMR spectrum of compound 2 before (upper) and after (lower) exposure to 365 nm UV light in DMSO-d<sub>6</sub>.

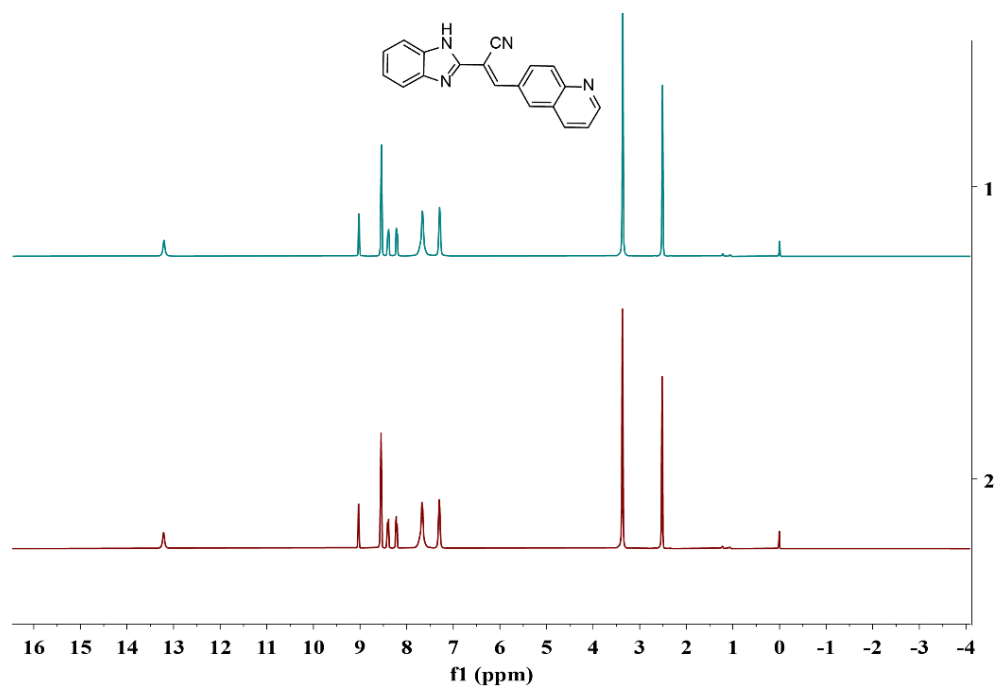

**Fig. S34.** <sup>1</sup>H NMR spectrum of compound 3 before (upper) and after (lower) exposure to 365 nm UV light in DMSO-d<sub>6</sub>.

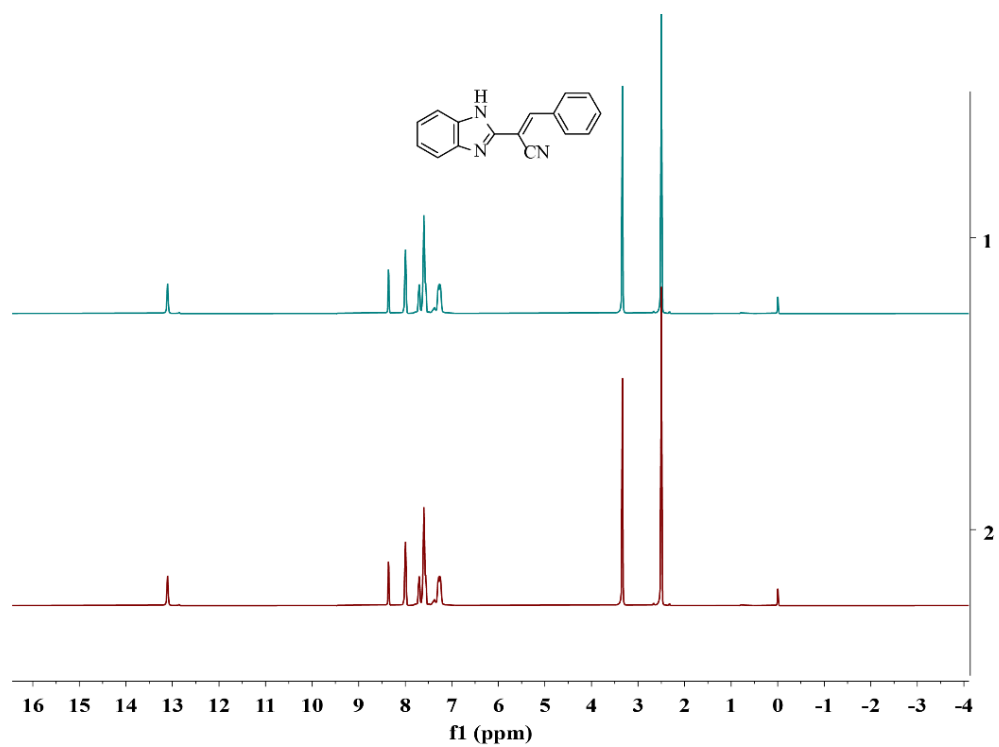

**Fig. S35.** <sup>1</sup>H NMR spectrum of compound 4 before (upper) and after (lower) exposure to 365 nm UV light in DMSO-d<sub>6</sub>.

**Table S1.** Crystallographic parameters of compounds **2** and **3**.

| Identification                             | <b>2</b>                                        | <b>3</b>                                         |
|--------------------------------------------|-------------------------------------------------|--------------------------------------------------|
| Empirical formula                          | C <sub>15</sub> H <sub>9</sub> ClN <sub>4</sub> | C <sub>19</sub> H <sub>14</sub> N <sub>4</sub> O |
| Formula weight                             | 280.71                                          | 314.34                                           |
| Crystal system                             | monoclinic                                      | monoclinic                                       |
| Space group                                | <i>I</i> 12/a1                                  | <i>P</i> 121/c1                                  |
| <i>a</i> /Å                                | 13.6775(8)                                      | 10.8369(8)                                       |
| <i>b</i> /Å                                | 7.0104(3)                                       | 7.3671(7)                                        |
| <i>c</i> /Å                                | 26.4013(12)                                     | 20.0273(14)                                      |
| $\alpha$ /°                                | 90                                              | 90                                               |
| $\beta$ /°                                 | 95.209(5)                                       | 104.078(7)                                       |
| $\gamma$ /°                                | 90                                              | 90                                               |
| Volume/Å <sup>3</sup>                      | 2521.0(2)                                       | 1550.9(2)                                        |
| <i>Z</i>                                   | 8                                               | 4                                                |
| $\rho_{\text{calc}}$ /(g/cm <sup>3</sup> ) | 1.479                                           | 1.346                                            |
| CCDC                                       | 2355948                                         | 2355949                                          |

**Table S2.** Photophysical data of compounds **1-4** in solution state and powder state.

| Compounds                                  | <b>1</b>           | <b>2</b>           | <b>3</b>           | <b>4</b>           |
|--------------------------------------------|--------------------|--------------------|--------------------|--------------------|
| $\lambda_{\text{abs, max}}$ (nm) in DCM    | 262                | 266                | 263                | 264                |
| $\lambda_{\text{em, max}}$ (nm) in DCM     | 496                | 503                | 476                | 463                |
| Fluorescence lifetime (ns)<br>in DCM       | 2.48               | 5.54               | 2.60               | 4.54               |
| Quantum yield (%) in<br>DCM                | 42.7               | 35.5               | 0.3                | 0.2                |
| Quantum yield (%) in<br>THF                | 21.0               | 38.3               | 1.0                | 0.5                |
| Quantum yield (%) in<br>ACE                | 28.3               | 32.3               | 0.9                | 0.8                |
| Quantum yield (%) in<br>ET                 | 28.5               | 19.2               | 1.0                | 0.3                |
| Quantum yield (%) in<br>DMSO               | 12.7               | 4.0                | 3.7                | 1.8                |
| $k_r$ ( $\text{s}^{-1}$ ) in DCM           | $1.72 \times 10^8$ | $6.41 \times 10^7$ | $1.15 \times 10^6$ | $4.41 \times 10^5$ |
| $k_{\text{nr}}$ ( $\text{s}^{-1}$ ) in DCM | $2.31 \times 10^8$ | $1.16 \times 10^8$ | $3.83 \times 10^8$ | $2.20 \times 10^8$ |
| $\lambda_{\text{em, max}}$ (nm)            | 494                | 522                | 517                | 492                |
| Fluorescence lifetime (ns)                 | 9.90               | 3.10               | 2.81               | 4.10               |
| Quantum yield (%)                          | 27.4               | 8.0                | 26.6               | 11.2               |
| $k_r$ ( $\text{s}^{-1}$ )                  | $2.77 \times 10^7$ | $2.58 \times 10^7$ | $7.01 \times 10^7$ | $5.15 \times 10^7$ |
| $k_{\text{nr}}$ ( $\text{s}^{-1}$ )        | $7.33 \times 10^7$ | $2.97 \times 10^8$ | $2.82 \times 10^8$ | $1.85 \times 10^8$ |

**Table S3.** TD-DFT/B3LYP/6-311G (d, p) theory calculated  $S_1 \rightarrow S_0$  fluorescence emission wavelengths, energies, and corresponding oscillator strength values for compounds **1-4** in gas phase and DCM solvated medium.

| Compounds         | Medium    | $\lambda$ (nm) | E (eV) | Osc. strength ( $f$ ) | Expt (nm) in DCM |
|-------------------|-----------|----------------|--------|-----------------------|------------------|
| <b>1</b>          | Gas phase | 482            | 2.57   | 0.0770                | 496              |
|                   | DCM       | 489            | 2.53   | 1.0757                |                  |
| <b>1 (isomer)</b> | Gas phase | 491            | 2.52   | 0.2600                | 503              |
|                   | DCM       | 522            | 2.38   | 0.7062                |                  |
| <b>2</b>          | Gas phase | 510            | 2.43   | 0.0558                | 503              |
|                   | DCM       | 508            | 2.44   | 1.0232                |                  |
| <b>2 (isomer)</b> | Gas phase | 513            | 2.42   | 0.2223                | 476              |
|                   | DCM       | 545            | 2.27   | 0.6628                |                  |
| <b>3</b>          | Gas phase | 438            | 2.83   | 1.0870                | 476              |
|                   | DCM       | 506            | 2.45   | 1.6058                |                  |
| <b>3 (isomer)</b> | Gas phase | 428            | 2.90   | 1.2776                | 463              |
|                   | DCM       | 496            | 2.50   | 1.7167                |                  |
| <b>4</b>          | Gas phase | 458            | 2.71   | 0.2347                | 463              |
|                   | DCM       | 502            | 2.47   | 1.1335                |                  |



**Table S4.** Calculated radiative rate ( $k_r$ ), internal conversion rate ( $k_{IC}$ ) constants (at adiabatic excitation energy) using TVCF formalism with DRE approach. Calculated probability of occurrence ( $P(T)$ ), and fluorescence quantum yields ( $\Phi_{tot}^{theory}$ ) which further compared to the experimental quantum yield in dichloromethane solvent.

| Compounds         | $k_r (s^{-1})$      | $k_{IC} (s^{-1})$      | P(T)  | $\Phi^{theory}(\%)$ | $\Phi_{tot}^{theory}(\%)$ | Expt.<br>$\Phi_{DCM}(\%)$ |
|-------------------|---------------------|------------------------|-------|---------------------|---------------------------|---------------------------|
| <b>1</b>          | $2.146 \times 10^8$ | $1.450 \times 10^9$    | 0.458 | 12.9                | 59.5                      | 42.7                      |
| <b>1 (isomer)</b> | $1.496 \times 10^8$ | $1.715 \times 10^6$    | 0.542 | 98.9                |                           |                           |
| <b>2</b>          | $5.373 \times 10^7$ | $9.371 \times 10^{10}$ | 0.125 | 0.06                | 85.7                      | 35.5                      |
| <b>2 (isomer)</b> | $1.314 \times 10^8$ | $2.875 \times 10^6$    | 0.875 | 97.9                |                           |                           |
| <b>3</b>          | $1.091 \times 10^8$ | $8.367 \times 10^{10}$ | 0.450 | 0.13                | 0.22                      | 0.3                       |
| <b>3 (isomer)</b> | $1.840 \times 10^8$ | $6.099 \times 10^{10}$ | 0.550 | 0.30                |                           |                           |
| <b>4</b>          | $6.596 \times 10^7$ | $5.636 \times 10^{10}$ | --    | 0.12                | 0.12                      | 0.2                       |

**Table S5.** Calculated total energies and energy differences of studied isomeric compounds.

| Compounds         | Total energy<br>E (kcal/mol) | Energy difference<br>(kcal/mol) |
|-------------------|------------------------------|---------------------------------|
| <b>1</b>          | -500005.4362                 | 1.8492                          |
| <b>1 (isomer)</b> | -500007.2855                 |                                 |
| <b>2</b>          | -788419.6445                 | 1.2322                          |
| <b>2 (isomer)</b> | -788420.8767                 |                                 |
| <b>3</b>          | -596443.0086                 | 1.5261                          |
| <b>3 (isomer)</b> | -596444.5347                 |                                 |

**Table S6.** Summarizes the experimental (EX) and computationally (COMP) obtained photophysics data.

| Compounds                               | 1                   | 2                   | 3                   | 4                   |
|-----------------------------------------|---------------------|---------------------|---------------------|---------------------|
| $\lambda_{em, max}$ (nm) in DCM of EX   | 496                 | 503                 | 476                 | 463                 |
| $\lambda_{em, max}$ (nm) in DCM of COMP | 489                 | 508                 | 506                 | 502                 |
| Quantum yield (%) in DCM of EX          | 42.7                | 35.5                | 0.3                 | 0.2                 |
| Quantum yield (%) in DCM of COMP        | 59.5                | 85.7                | 0.22                | 0.12                |
| $k_r$ (s <sup>-1</sup> ) in DCM of EX   | $1.72 \times 10^8$  | $6.41 \times 10^7$  | $1.15 \times 10^6$  | $4.41 \times 10^5$  |
| $k_r$ (s <sup>-1</sup> ) in DCM of COMP | $2.146 \times 10^8$ | $5.373 \times 10^7$ | $1.091 \times 10^8$ | $6.596 \times 10^7$ |

## References

- (1) M. J. Frisch, G. W. T., H. B. Schlegel, G. E. Scuseria, M. A. Robb, J. R. Cheeseman, G. Scalmani, V. Barone, G. A. Petersson, H. Nakatsuji, X. Li, M. Caricato, A. V. Marenich, J. Bloino, B. G. Janesko, R. Gomperts, B. Mennucci, H. P. Hratchian, J. V. Ortiz, A. F. Izmaylov, J. L. Sonnenberg, D. Williams-Young, F. Ding, F. Lipparini, F. Egidi, J. Goings, B. Peng, A. Petrone, T. Henderson, D. Ranasinghe, V. G. Zakrzewski, J. Gao, N. Rega, G. Zheng, W. Liang, M. Hada, M. Ehara, K. Toyota, R. Fukuda, J. Hasegawa, M. Ishida, T. Nakajima, Y. Honda, O. Kitao, H. Nakai, T. Vreven, K. Throssell, J. A. Montgomery, Jr., J. E. Peralta, F. Ogliaro, M. J. Bearpark, J. J. Heyd, E. N. Brothers, K. N. Kudin, V. N. Staroverov, T. A. Keith, R. Kobayashi, J. Normand, K. Raghavachari, A. P. Rendell, J. C. Burant, S. S. Iyengar, J. Tomasi, M. Cossi, J. M. Millam, M. Klene, C. Adamo, R. Cammi, J. W. Ochterski, R. L. Martin, K. Morokuma, O. Farkas, J. B. Foresman and D. J. Fox, Gaussian, Inc., Wallingford CT, 2016. Gaussian 16, Revision B.01. **2016**.
- (2) M. E. Casida, C. Jamorski, K. C. Casida, D. R. Salahub, *J. Chem. Phys.*, 1998, **108**, 4439-4449.
- (3) A. D. Laurent, C. Adamo, D. Jacquemin, *Phys. Chem. Chem. Phys.*, 2014, **16**, 14334-14356.
- (4) C. Adamo, D. Jacquemin, *Chem. Soc. Rev.*, 2013, **42**, 845-856.
- (5) L. A. Curtiss, M. P. McGrath, J. P. Blaudeau, N. E. Davis, R. C. Binning Jr, L. Radom, *J. Chem. Phys.*, 1995, **103**, 6104-6113.

- (6) P. K. Samanta, D. Kim, V. Coropceanu, J.-L. Brédas, *J. Am. Chem. Soc.*, 2017, **139**, 4042-4051.
- (7) A. D. McLean, G. S. Chandler, *J. Chem. Phys.*, 1980, **72**, 5639-5648.
- (8) Y. Niu, W. Li, Q. Peng, H. Geng, Y. Yi, L. Wang, G. Nan, D. Wang, Z. Shuai, *Mol. Phys.*, 2018, **116**, 1078-1090.
- (9) E. Van Lenthe, J. G. Snijders, E. J. Baerends, *J. Chem. Phys.*, 1996, **105**, 6505-6516.
- (10) Q. Peng, Y. Yi, Z. Shuai, J. Shao, *J. Am. Chem. Soc.*, 2007, **129**, 9333-9339.
- (11) Y. L. Niu, Q. Peng, Z. G. Shuai, *Sci. China Ser. B*, 2008, **51**, 1153-1158.
- (12) E. Van Lenthe, R. Van Leeuwen, E. J. Baerends, J. G. Snijders, *Int. J. Quantum. Chem.*, 1996, **57**, 281-293.
- (13) V. G. Plotnikov, *Int. J. Quantum. Chem.*, 1979, **16**, 527-541.
- (14) Z. Shuai, Q. Peng, *Natl. Sci. Rev.*, 2017, **4**, 224-239.
- (15) Y. Niu, Q. Peng, C. Deng, X. Gao, Z. Shuai, *J. Phys. Chem. A*, 2010, **114**, 7817-7831.
- (16) R. R. Valiev, A. N. Sinelnikov, Y. V. Aksenova, R. T. Kuznetsova, M. B. Berezin, A. S. Semeikin, V. N. Cherepanov, *Spectrochim. Acta. A*, 2014, **117**, 323-329.
- (17) R. R. Valiev, R. T. Nasibullin, V. N. Cherepanov, G. V. Baryshnikov, D. Sundholm, H. Ågren, B. F. Minaev, T. Kurtén, *Phys. Chem. Chem. Phys.*, 2020, **22**, 22314-22323.
- (18) R. R. Valiev, R. T. Nasibullin, V. N. Cherepanov, A. Kurtsevich, D. Sundholm, T. Kurtén, *Phys. Chem. Chem. Phys.*, 2021, **23**, 6344-6348.
- (19) R. R. Valiev, B. S. Merzlikin, R. T. Nasibullin, A. Kurtsevich, V. N. Cherepanov, R. R. Ramazanov, D. Sundholm, T. Kurtén, *Phys. Chem. Chem. Phys.*, 2023, **25**, 6406-6415.
- (20) R. Engelman, J. Jortner, *Mol. Phys.*, 1970, **18**, 145-164.
- (21) *ADF Theoretical Chemistry*, Vrije Universiteit, Amsterdam, The Netherlands, 2023. <http://www.scm.com> (Accessed.)
- (22) C. E. Buelna-Garcia, J. L. Cabellos, J. M. Quiroz-Castillo, G. Martinez-Guajardo, C. Castillo-Quevedo, A. de-Leon-Flores, G. Anzueto-Sanchez, M. F. Martin-del-Campo-Solis, *Materials* 2020, **14**, 112.
- (23) E. W. Schlag, S. Schneider, S. F. Fischer, *Annu. Rev. Phys. Chem.*, 1971, **22**, 465-526.
- (24) S. P. McGlynn, T. Azumi, M. Kinoshita, *Prentice-Hall*, 1969.
- (25) W. Siebrand, *J. Chem. Phys.*, 1967, **46**, 440-447.
